# Supplementary material for: A randomized, placebo-controlled trial to determine the course of aminotransferase elevation during prolonged acetaminophen administration
Source: PubMed Central journal article supplement (PMC4118644; doi:10.1186/2050-6511-15-39), 2014-07-22
Supplement: 2050-6511-15-39-S1.pdf [file 2050-6511-15-39-S1.pdf]

Supplemental Table 3. Adverse effects by class for all randomized subjects. Subjects were treated with acetaminophen (4g/day) or placebo).

| <b>System Organ Class</b>                            | <b>Acetaminophen<br/>Incidence<br/>n=224</b> | <b>Placebo<br/>Incidence<br/>n=52</b> | <b>Total<br/>Incidence<br/>n=276</b> | <b>p<br/>Value</b> |
|------------------------------------------------------|----------------------------------------------|---------------------------------------|--------------------------------------|--------------------|
| Ear and labyrinth disorders                          | 3 (1.3%)                                     | 0 (0.0%)                              | 3 (1.1%)                             | 1.0000             |
| Eye disorders                                        | 2 (0.9%)                                     | 0 (0.0%)                              | 2 (0.7%)                             | 1.0000             |
| Gastrointestinal disorders                           | 70 (31.3%)                                   | 10 (19.2%)                            | 80 (29.0%)                           | 0.0922             |
| General disorders and administration site conditions | 23 (10.3%)                                   | 3 (5.8%)                              | 26 (9.4%)                            | 0.4331             |
| Infections and infestations                          | 14 (6.3%)                                    | 2 (3.8%)                              | 16 (5.8%)                            | 0.7443             |
| Injury, poisoning and procedural complications       | 10 (4.5%)                                    | 2 (3.8%)                              | 12 (4.3%)                            | 1.0000             |
| Metabolism and nutrition disorders                   | 3 (1.3%)                                     | 1 (1.9%)                              | 4 (1.4%)                             | 0.5683             |
| Musculoskeletal and connective tissue disorders      | 26 (11.6%)                                   | 5 (9.6%)                              | 31 (11.2%)                           | 0.8106             |
| Nervous system disorders                             | 42 (18.8%)                                   | 11 (21.2%)                            | 53 (19.2%)                           | 0.6978             |
| Psychiatric disorders                                | 6 (2.7%)                                     | 1 (1.9%)                              | 7 (2.5%)                             | 1.0000             |
| Renal and urinary disorders                          | 0 (0.0%)                                     | 1 (1.9%)                              | 1 (0.4%)                             | 0.1884             |
| Reproductive system and breast disorders             | 5 (2.2%)                                     | 1 (1.9%)                              | 6 (2.2%)                             | 1.0000             |
| Respiratory, thoracic and mediastinal disorders      | 23 (10.3%)                                   | 5 (9.6%)                              | 28 (10.1%)                           | 1.0000             |
| Skin and subcutaneous tissue disorders               | 9 (4.0%)                                     | 0 (0.0%)                              | 9 (3.3%)                             | 0.2160             |
| Vascular disorders                                   | 9 (4.0%)                                     | 1 (1.9%)                              | 10 (3.6%)                            | 0.6935             |
| <i>P value is based on Fisher's exact test.</i>      |                                              |                                       |                                      |                    |
